# Supplementary material for: Torin1-mediated TOR kinase inhibition reduces Wee1 levels and advances mitotic commitment in fission yeast and HeLa cells
Source: PubMed Central journal article supplement (PMC3953821; doi:10.1242/jcs.146373), 2014-03-15
Supplement: supp_127.6.1346_JCS146373.pdf [file supp_127.6.1346_JCS146373.pdf]

**Table S1: *S. pombe* strains used in this study**

| Strain | Genotype                                                                              | Source                                                                     |
|--------|---------------------------------------------------------------------------------------|----------------------------------------------------------------------------|
| JP3    | <i>h<sup>-</sup> 972</i>                                                              | Lab stock                                                                  |
| JP57   | <i>h<sup>-</sup> plo1.S402A</i>                                                       | Lab stock                                                                  |
| JP350  | <i>h<sup>+</sup></i>                                                                  | Lab stock                                                                  |
| JP567  | <i>h<sup>-</sup> cdc2-1w</i>                                                          | (Thuriaux et al., 1978)                                                    |
| JP568  | <i>h<sup>-</sup> cdc2-3w</i>                                                          | (Fantes, 1981)                                                             |
| JP1377 | <i>sin1::kanMx6</i>                                                                   | <i>sin1::kanMx6</i> from<br>(Ikeda et al., 2008)                           |
| JP1491 | <i>tor1::ura4<sup>+</sup> ura4-D18</i>                                                | <i>tor1::ura4<sup>+</sup></i> from<br>(Matsuo et al., 2003)                |
| JP2337 | <i>cdr2::ura4<sup>+</sup> ura4-D18</i>                                                | <i>cdr2::ura4<sup>+</sup></i> from<br>(Bimbo et al., 2005)                 |
| JP1662 | <i>h<sup>+</sup> nmt81-GFPwee1</i>                                                    | (Moseley et al., 2009)                                                     |
| JP1670 | <i>h<sup>+</sup>cdc25:12myc-ura4<sup>+</sup> ura4-D18</i>                             | <i>cdc25:12myc.ura4<sup>+</sup></i><br>from (Lopez-Girona et<br>al., 1999) |
| JP1669 | <i>h<sup>+</sup> tor2-G2040D</i>                                                      | This study                                                                 |
| JP1731 | <i>h<sup>-</sup> maf1pk-kanMx6</i>                                                    | Lab stock                                                                  |
| JP1763 | <i>h<sup>-</sup>maf1pk-kanMx6 tor2-G2040D</i>                                         | This study                                                                 |
| JP2081 | <i>tor2-G2040D nmt81-GFPwee1</i>                                                      | This study                                                                 |
| JP2089 | <i>h<sup>+</sup> tor2::ura4<sup>+</sup> ura4-d18 leu1-32</i><br><i>pREP42NAT-tor2</i> | This study<br><i>tor2::ura4<sup>+</sup></i> from<br>(Weisman et al., 2007) |

|        |                                                                                |                    |
|--------|--------------------------------------------------------------------------------|--------------------|
| JP2090 | $h^+$ <i>tor2::ura4+ ura4-d18 leu1-32</i><br><i>pREP42NAT-tor2-G2040D</i>      | This study         |
| JP2177 | <i>cdr2::ura4+ nmt81-GFPwee1</i><br><i>ura4-d18</i>                            | This study         |
| JP2377 | <i>plo1.S402A nmt81-GFPwee1</i>                                                | This study         |
| JP2363 | $h^+$ <i>cdr2::ura4+ plo1.S402A</i><br><i>ura4.D18</i>                         | This study         |
| JP2405 | <i>cdr2::ura4+ plo1.S402A nmt81-</i><br><i>GFPwee1</i>                         | This study         |
| JP2411 | $h^-$ <i>cdc2::ura4+ leu1.32 ura4.D18</i><br><i>mns21L-cdc2.F15 integrated</i> | Paul Nurse<br>D832 |

## References

- Bimbo, A., Y. Jia, S.L. Poh, R.K. Karuturi, N. den Elzen, X. Peng, L. Zheng, M. O'Connell, E.T. Liu, M.K. Balasubramanian, and J. Liu. 2005. Systematic deletion analysis of fission yeast protein kinases. *Eukaryotic cell*. 4:799-813.
- Fantes, P.A. 1981. ISOLATION OF CELL-SIZE MUTANTS OF A FISSION YEAST BY A NEW SELECTIVE METHOD - CHARACTERIZATION OF MUTANTS AND IMPLICATIONS FOR DIVISION CONTROL MECHANISMS. *Journal of Bacteriology*. 146:746-754.
- Ikeda, K., S. Morigasaki, H. Tatebe, F. Tamanoi, and K. Shiozaki. 2008. Fission yeast TOR complex 2 activates the AGC-family Gad8 kinase essential for stress resistance and cell cycle control. *Cell Cycle*. 7:358-364.
- Lopez-Girona, A., B. Furnari, O. Mondesert, and P. Russell. 1999. Nuclear localization of Cdc25 is regulated by DNA damage and a 14-3-3 protein. *Nature*. 397:172-175.
- Matsuo, T., Y. Kubo, Y. Watanabe, and M. Yamamoto. 2003. Schizosaccharomyces pombe AGC family kinase Gad8p forms a conserved signaling module with TOR and PDK1-like kinases. *Embo Journal*. 22:3073-3083.
- Moseley, J.B., A. Mayeux, A. Paoletti, and P. Nurse. 2009. A spatial gradient coordinates cell size and mitotic entry in fission yeast. *Nature*. 459:857-U858.
- Thuriaux, P., P. Nurse, and B. Carter. 1978. MUTANTS ALTERED IN CONTROL COORDINATING CELL-DIVISION WITH CELL-GROWTH IN FISSION YEAST

SCHIZOSACCHAROMYCES-POMBE. *Molecular & General Genetics*. 161:215-220.

Weisman, R., I. Roitburg, M. Schonbrun, R. Harari, and M. Kupiec. 2007. Opposite effects of Tor1 and Tor2 on nitrogen starvation responses in fission yeast. *Genetics*. 175:1153-1162.
